# Supplementary material for: Reliable assessment of telomere maintenance mechanisms in neuroblastoma
Source: PubMed Central journal article supplement (PMC9508734; doi:10.1186/s13578-022-00896-2), 2022-09-24

# Supplementary Figure 2

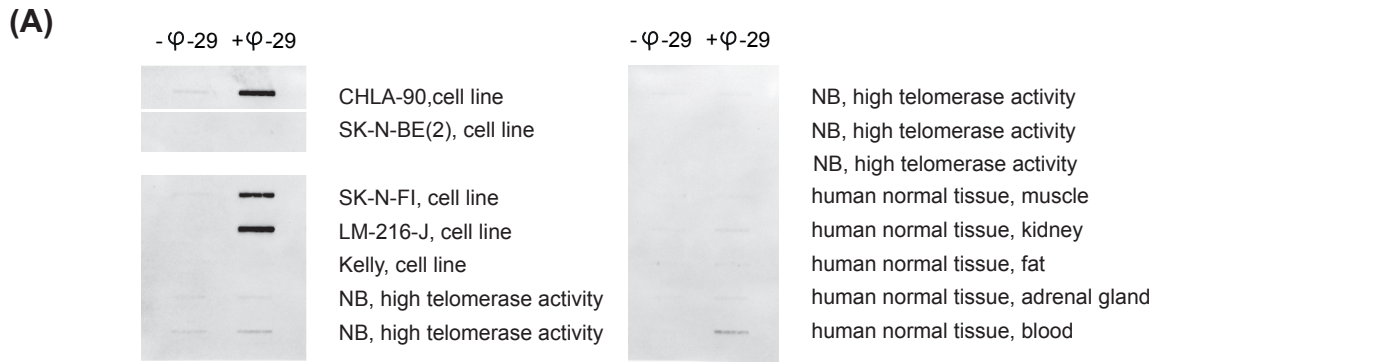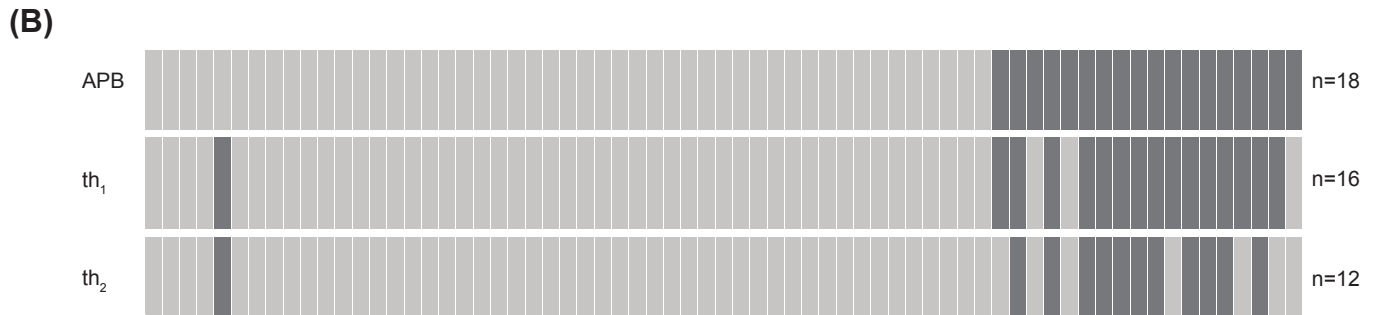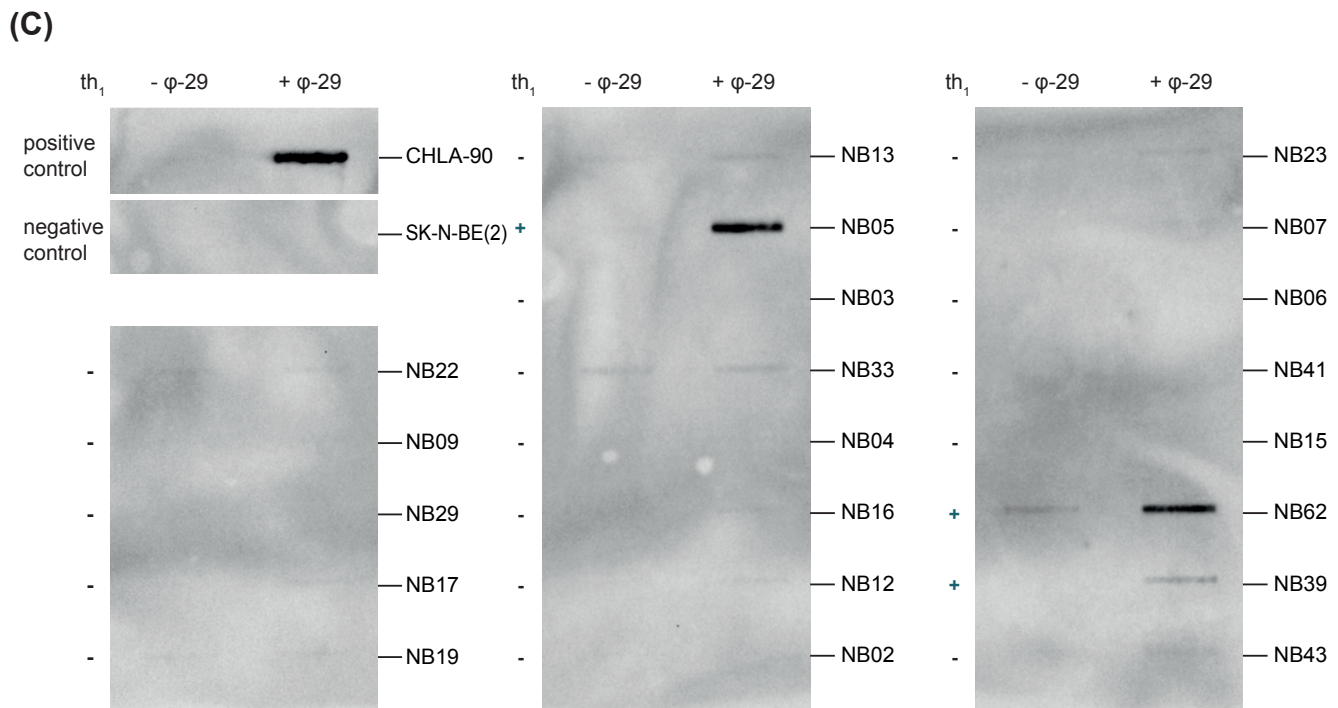

Supplement: 13578_2022_896_MOESM5_ESM.pdf [file 13578_2022_896_MOESM5_ESM.pdf]
